# Supplementary material for: Tropomyosin isoform Tpm2.1 regulates collective and amoeboid cell migration and cell aggregation in breast epithelial cells
Source: PubMed Central journal article supplement (PMC5707015; doi:10.18632/oncotarget.19182), 2017-07-12
Supplement: oncotarget-08-95192-s001.pdf [file oncotarget-08-95192-s001.pdf]

# Tropomyosin isoform Tpm2.1 regulates collective and amoeboid cell migration and cell aggregation in breast epithelial cells

## SUPPLEMENTARY MATERIALS

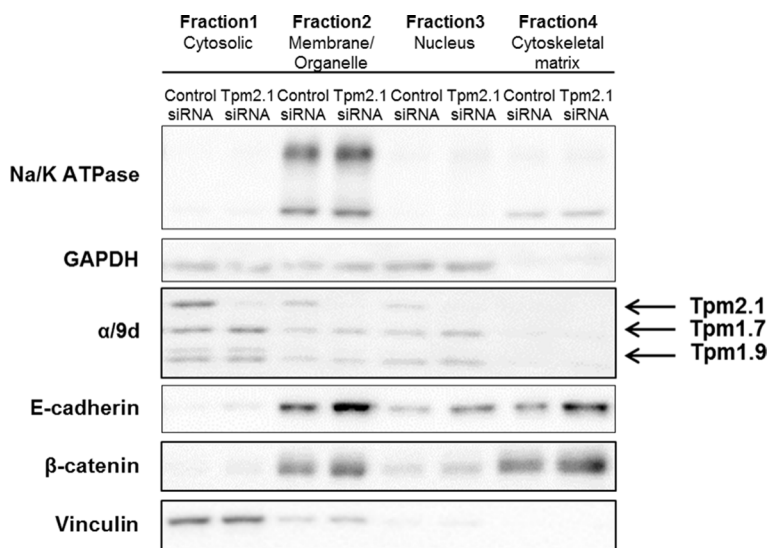

**Supplementary Figure 1: Downregulation of Tpm2.1 affects the level of cell-cell adhesion proteins in the membrane.** Protein expression of cell fractionated MCF10A cells were detected. Na/K ATPase and GAPDH was detected for fraction marker.

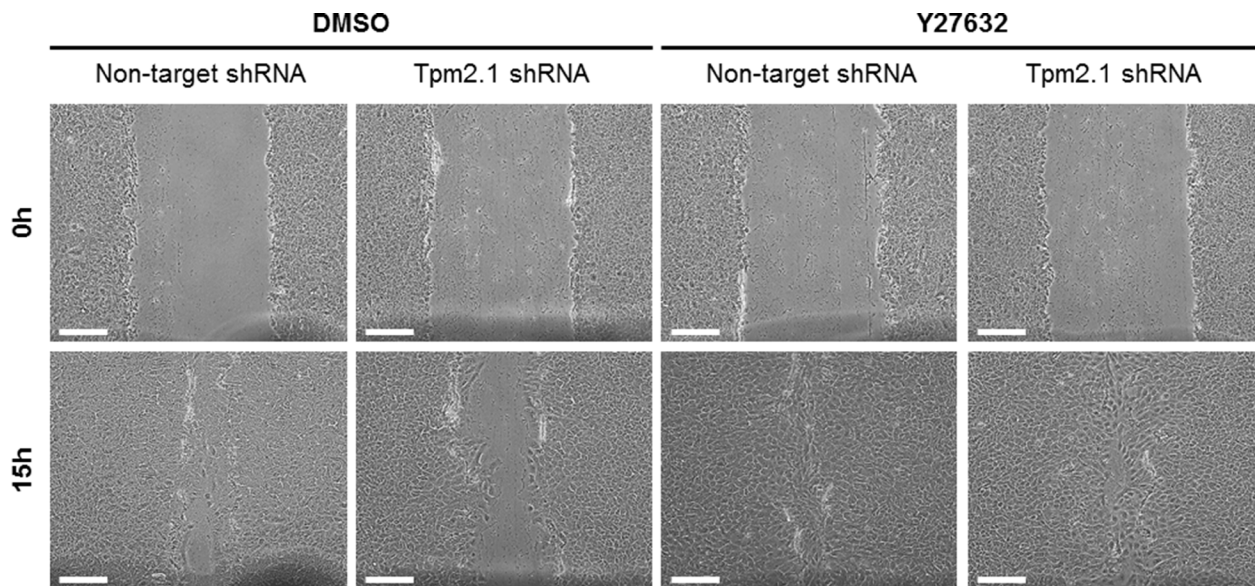

**Supplementary Figure 2: Inhibition of Rho kinase recovered collective migration following downregulation of Tpm2.1.** shRNA- treated against Tpm2.1 in MCF10A cells were treated with 10 μM Y27632 and were scratched to make a wound (Scale bar: 100 μm).

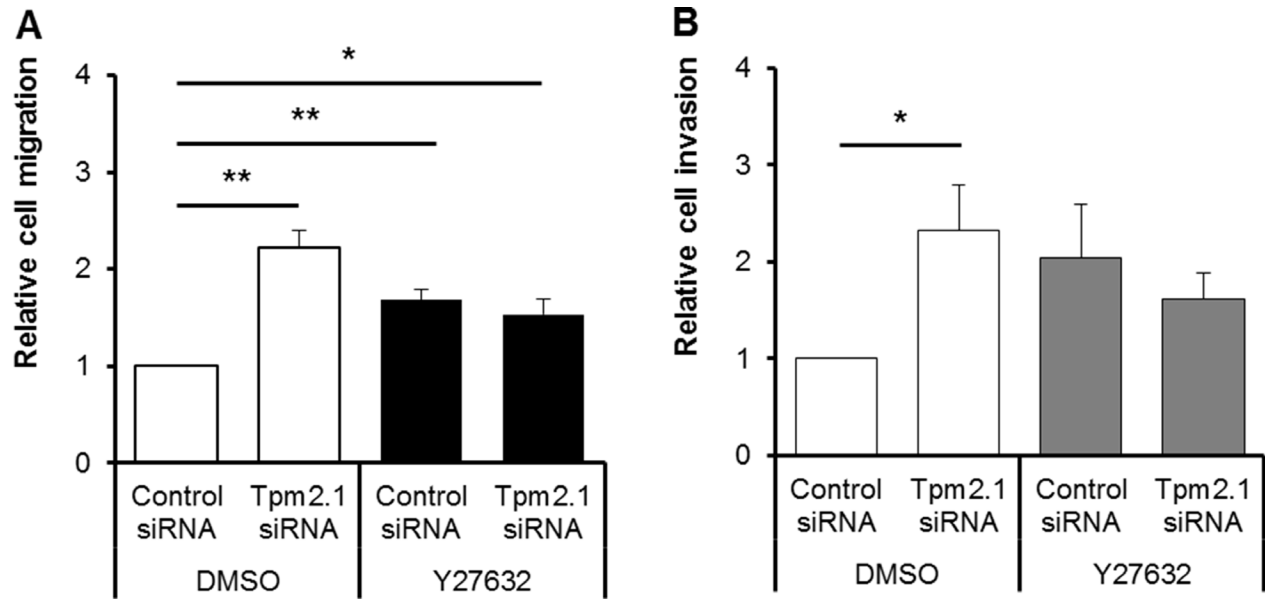

**Supplementary Figure 3: Inhibition of Rho kinase affects the rate of amoeboid cell migration and invasion.** (A–B) MCF10A cells were silenced with Tpm2.1 siRNA and were seeded on PET membrane to detect cell migration (A), or Matrigel-coated membrane for invasion (B).

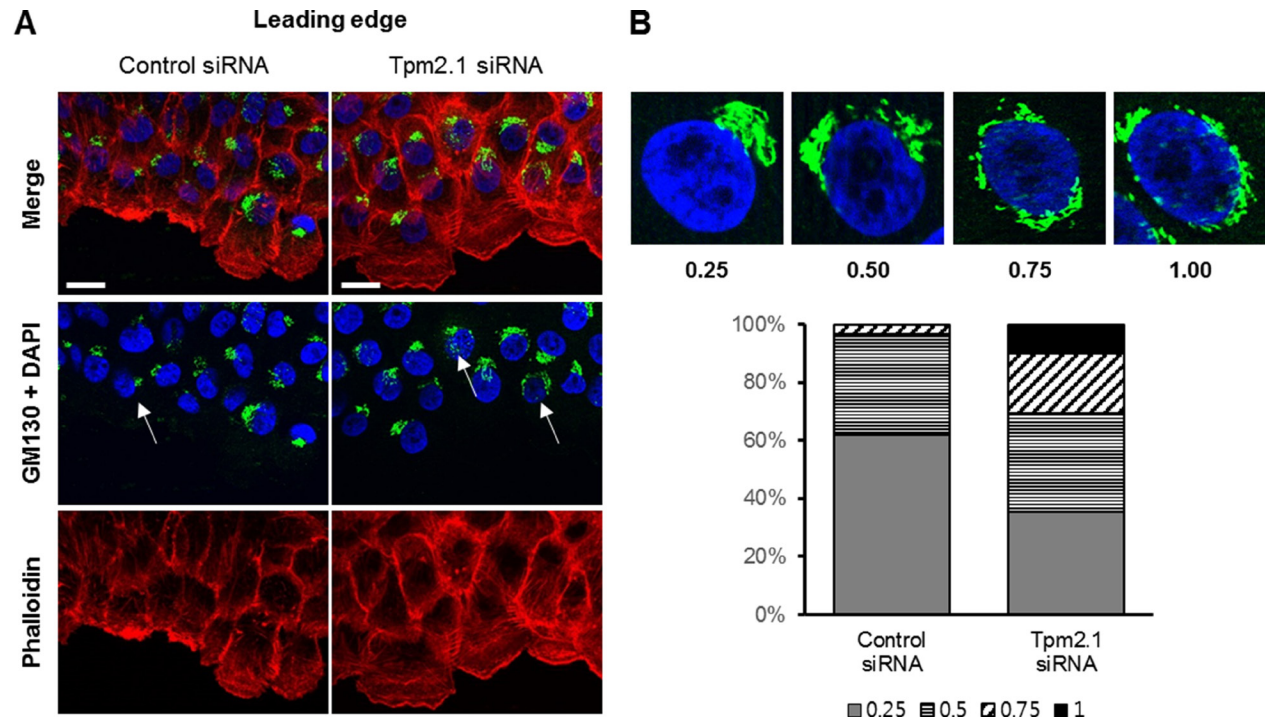

**Supplementary Figure 4: Tpm2.1 silencing affect cell polarity.** (A) The leading edge of RNAi treated MCF10A cells undergoing wound healing were stained with antibodies against GM130, phalloidin and DAPI. (Scale bar: 20  $\mu$ m) (B) Expression of GM130 was quantified by counting the expression at the leading edge of the wound, categorizing the cells with a reference shown of GM130 expression area around the nucleus ( $n = 60$ ).

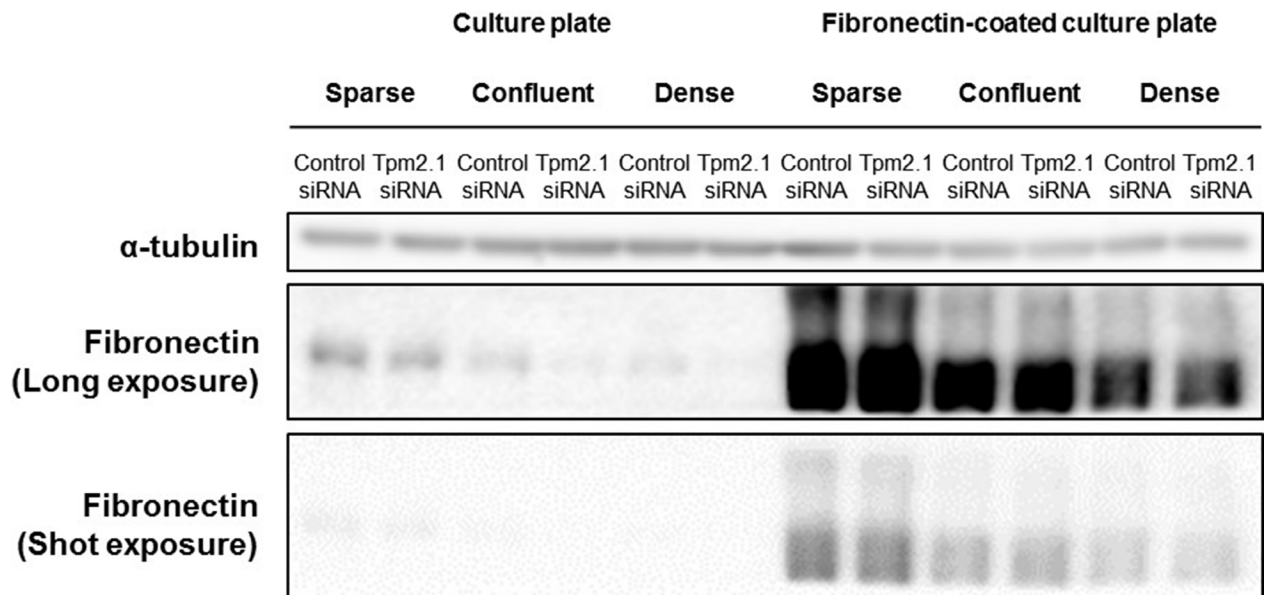

**Supplementary Figure 5: Exposure to fibronectin induces positive feedback in MCF10A cells.** RNAi- treated against MCF10A cells were seeded on culture plate or fibronectin-coated culture plate under different cell density and total cell lysates were detected against fibronectin.  $\alpha$ -tubulin was used as a loading control.

**Supplementary Movie 1: EGF-activated wound healing migration in MCF10A cells.** 100 ng/ml EGF treated (A) control and (B) Tpm2.1-silenced MCF10A cells were wounded to monitor EGF activation during wound healing. See [Supplementary\\_Movie\\_1](#)

**Supplementary Movie 2: Downregulation of Tpm2.1 increases single cell migration.** (A) Control and (B) Tpm2.1-silenced MCF10A cells were cultured on fibronectin coated plates to monitor single cell migration. See [Supplementary\\_Movie\\_2](#)
